# Supplementary material for: Three-dimensional cranial ultrasound and functional near-infrared spectroscopy for bedside monitoring of intraventricular hemorrhage in preterm neonates
Source: PubMed Central journal article supplement (PMC9988970; doi:10.1038/s41598-023-30743-4), 2023-03-06
Supplement: 41598_2023_30743_MOESM1_ESM.pdf [file 41598_2023_30743_MOESM1_ESM.pdf]

## Supplementary figures

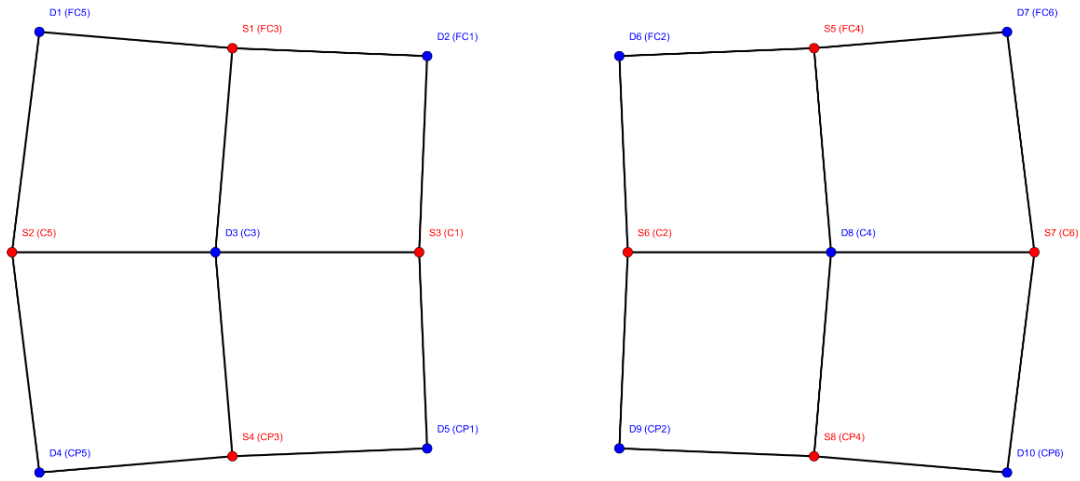

*Supplementary Figure 1: Montage*

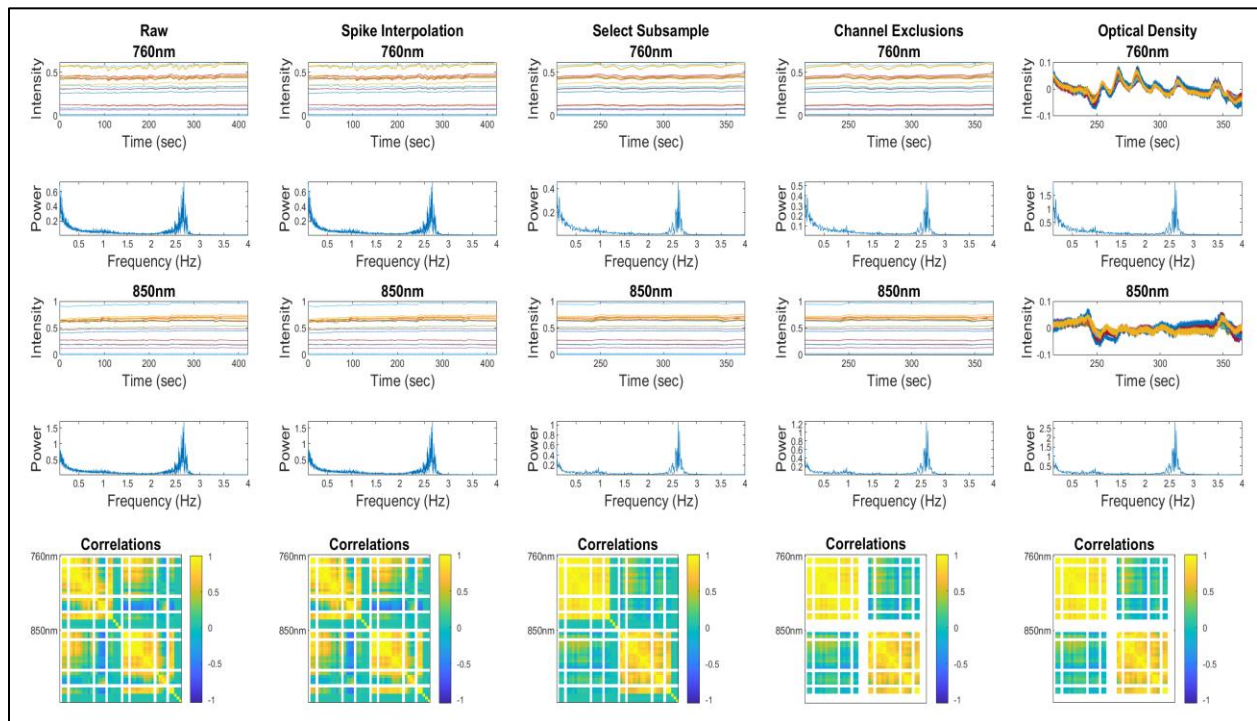

*Supplementary Figure 2: Preprocessing pipeline, from the acquisition of raw data to optical density*

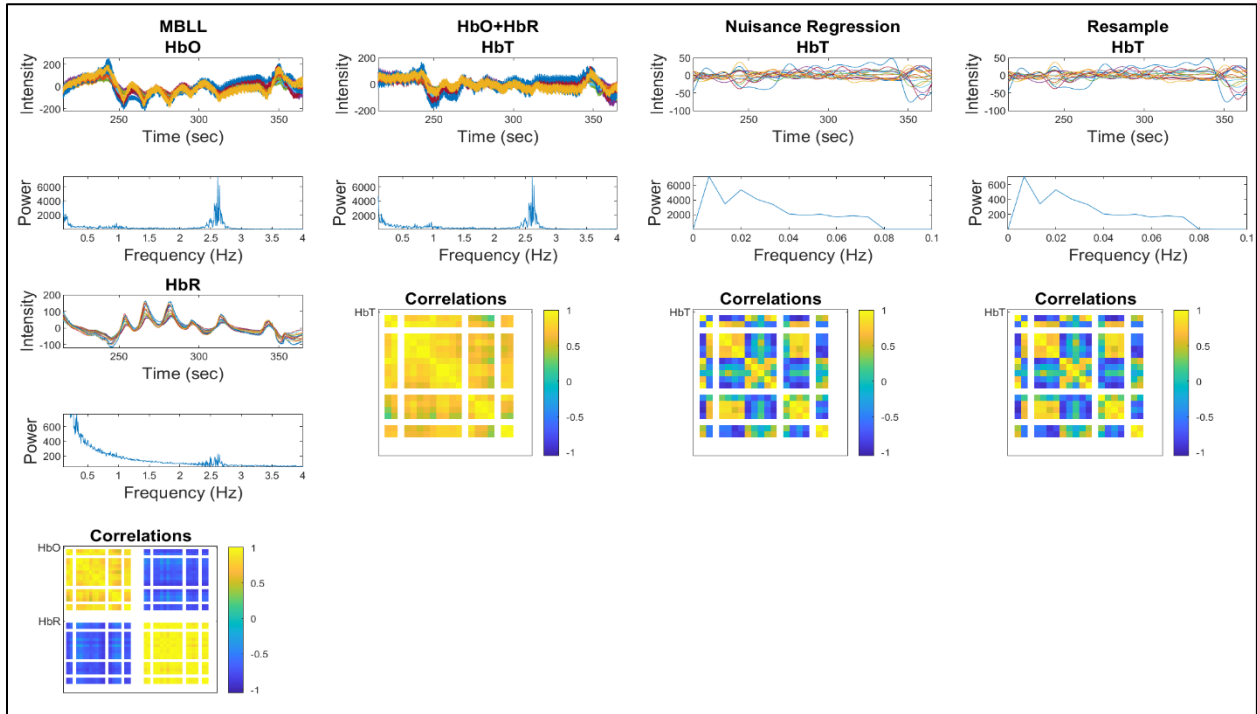

*Supplementary Figure 3: Preprocessing pipeline (continued)*

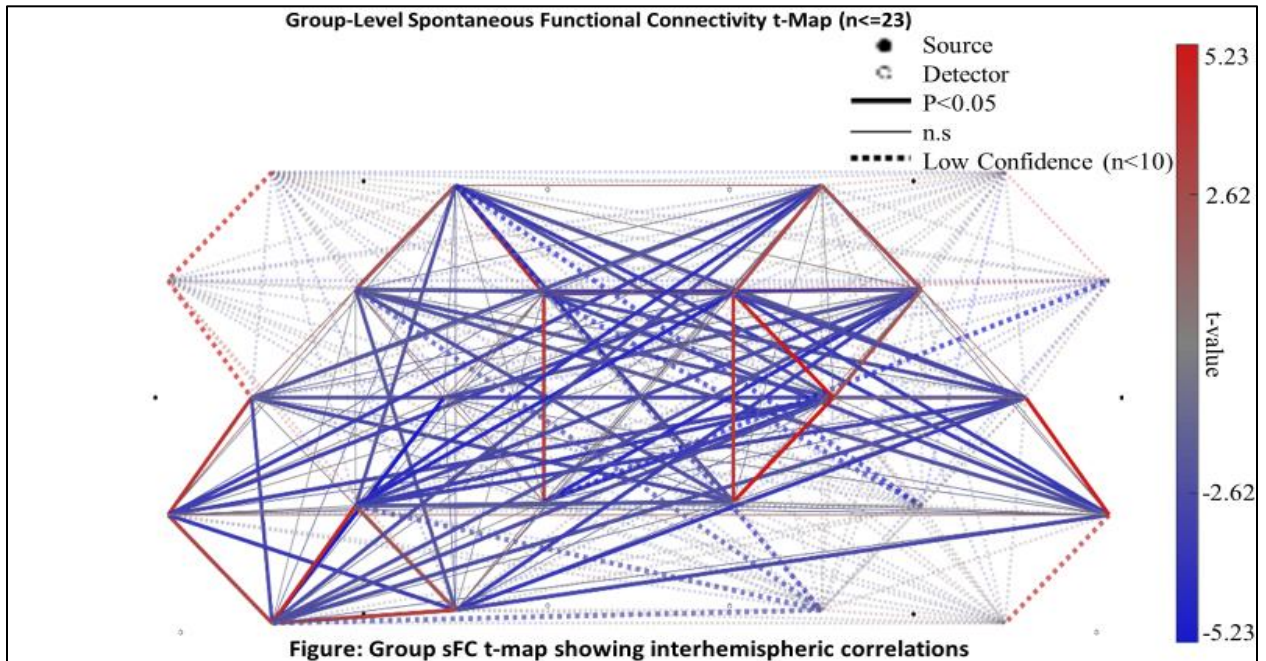

*Supplementary Figure 4: Group t-map showing interhemispheric correlations*

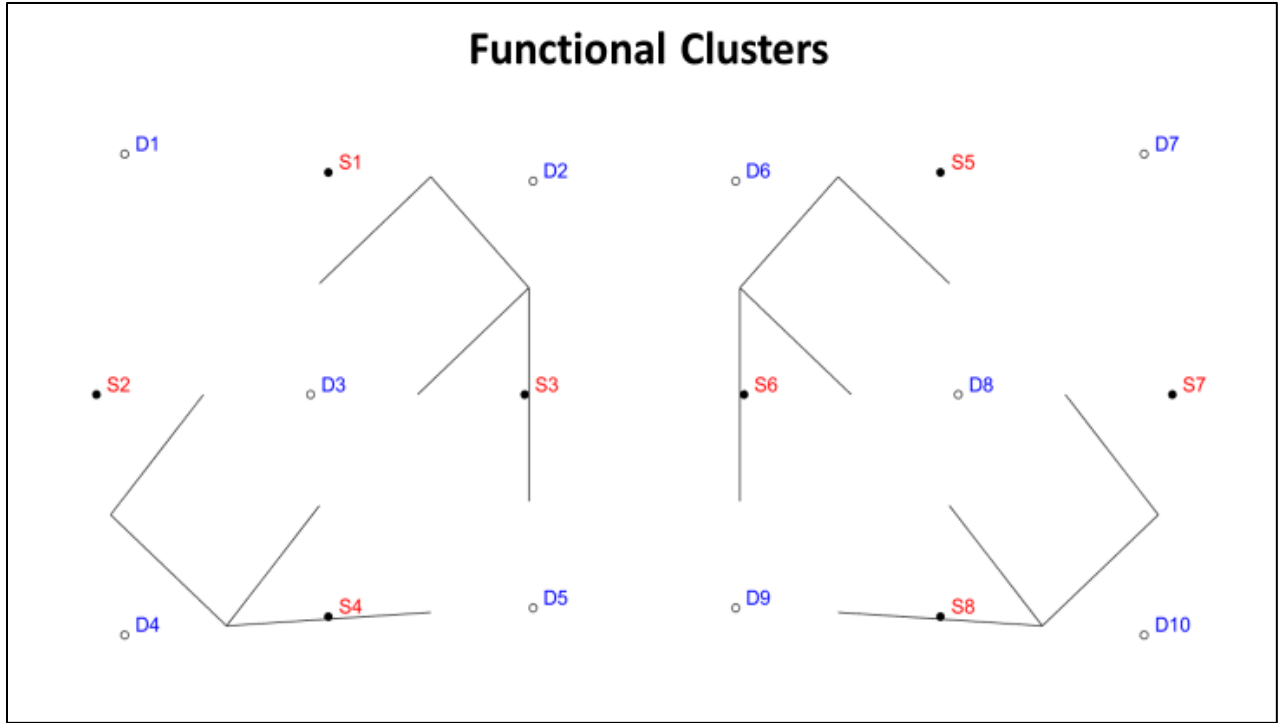

*Supplementary Figure 5: Four functional clusters*

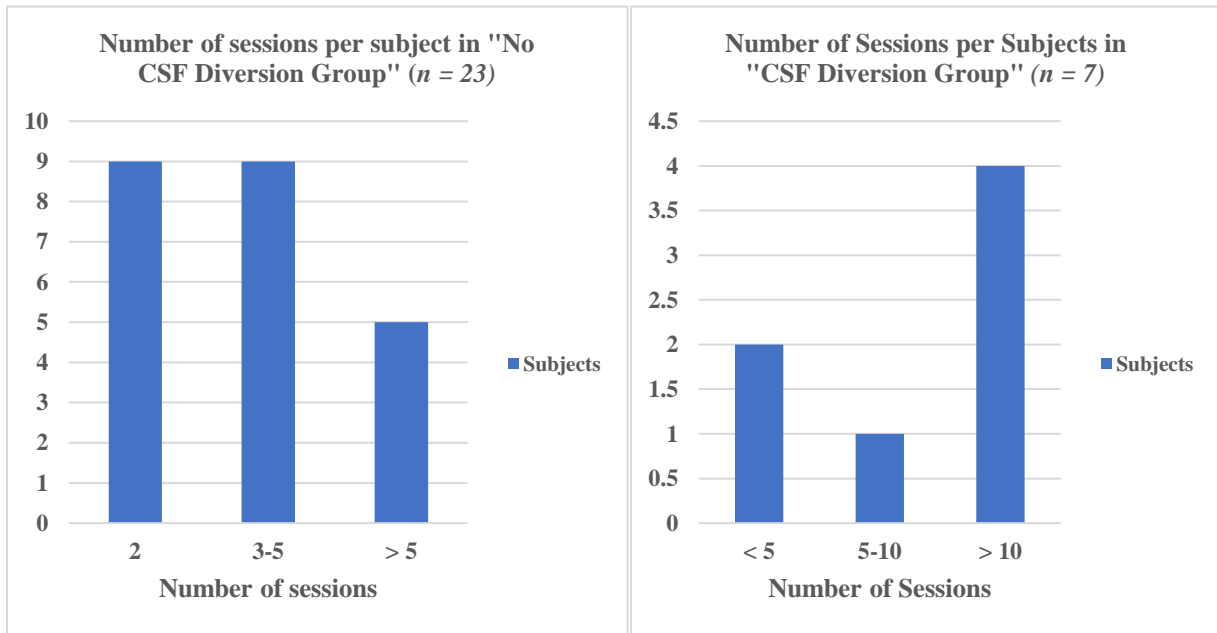

*Supplementary Figure 6: Figure showing number of sessions per patient in both groups*

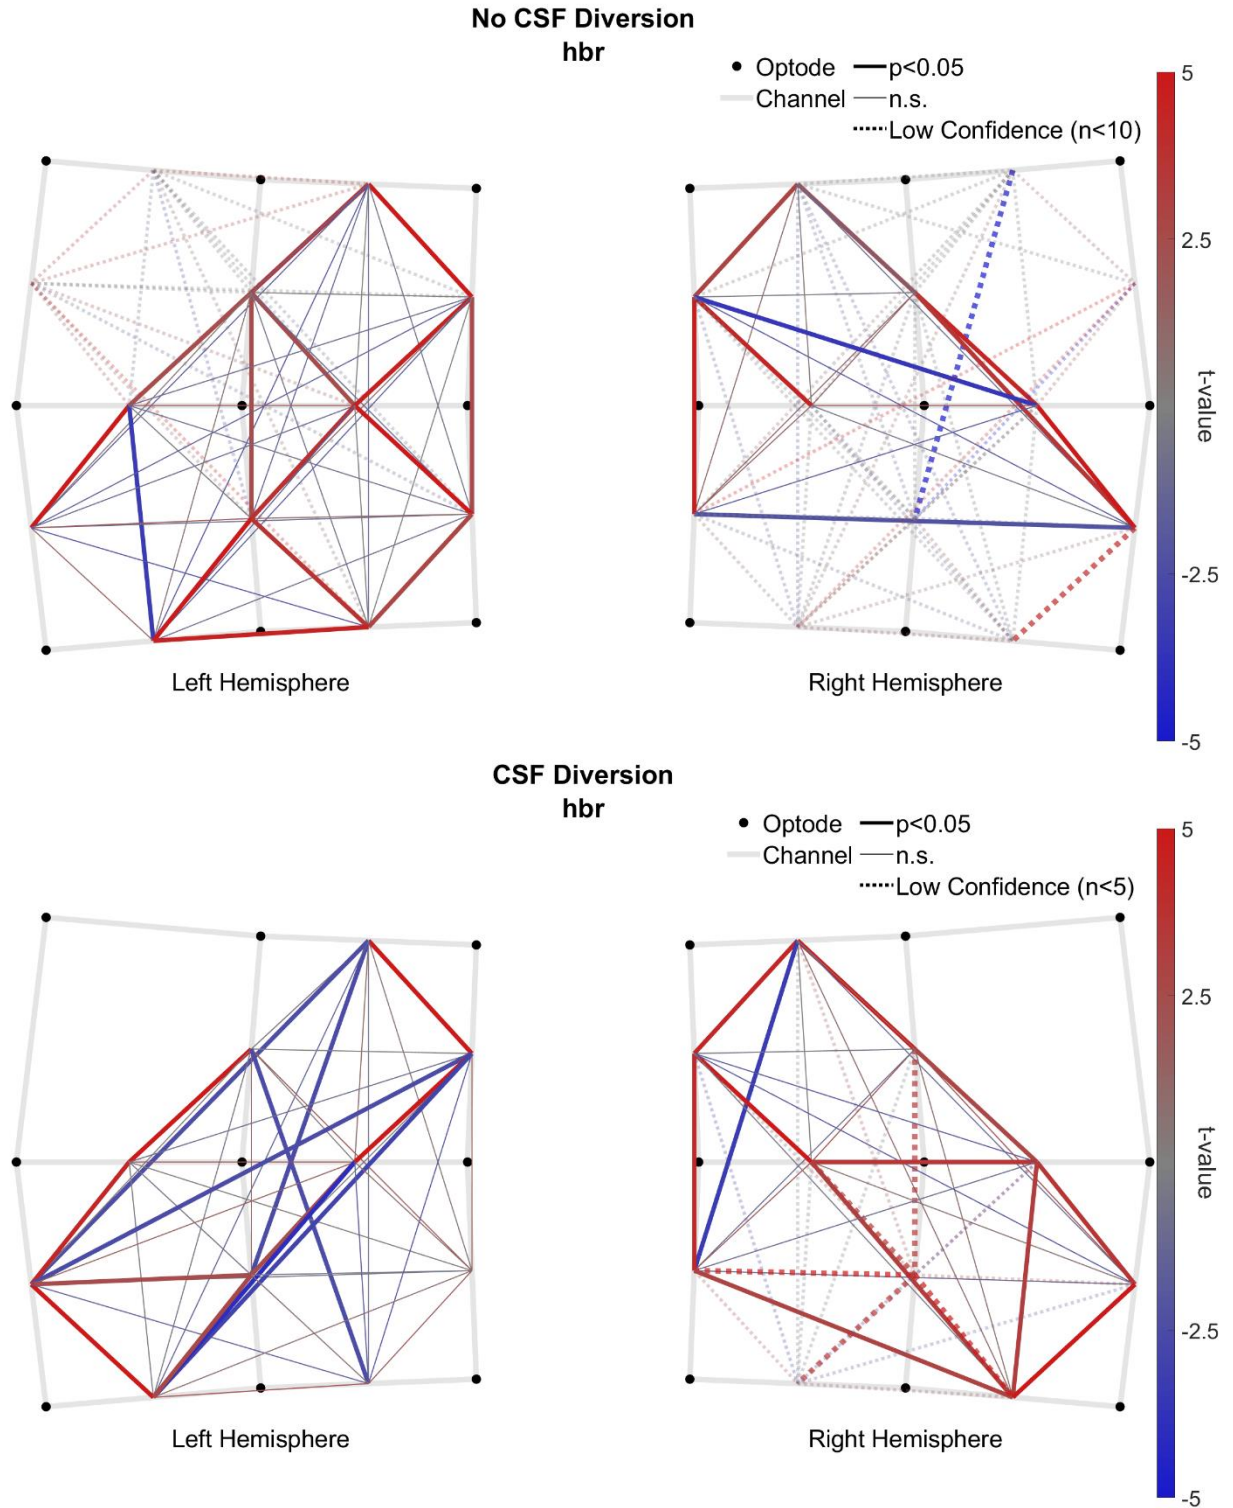

**Supplementary Figure 7:** Group level sFC maps (top row, “No CSF Diversion group,  $n = 23$ ”; bottom row, “CSF Diversion group”.  $N = 7$ ). HbR = deoxygenated hemoglobin

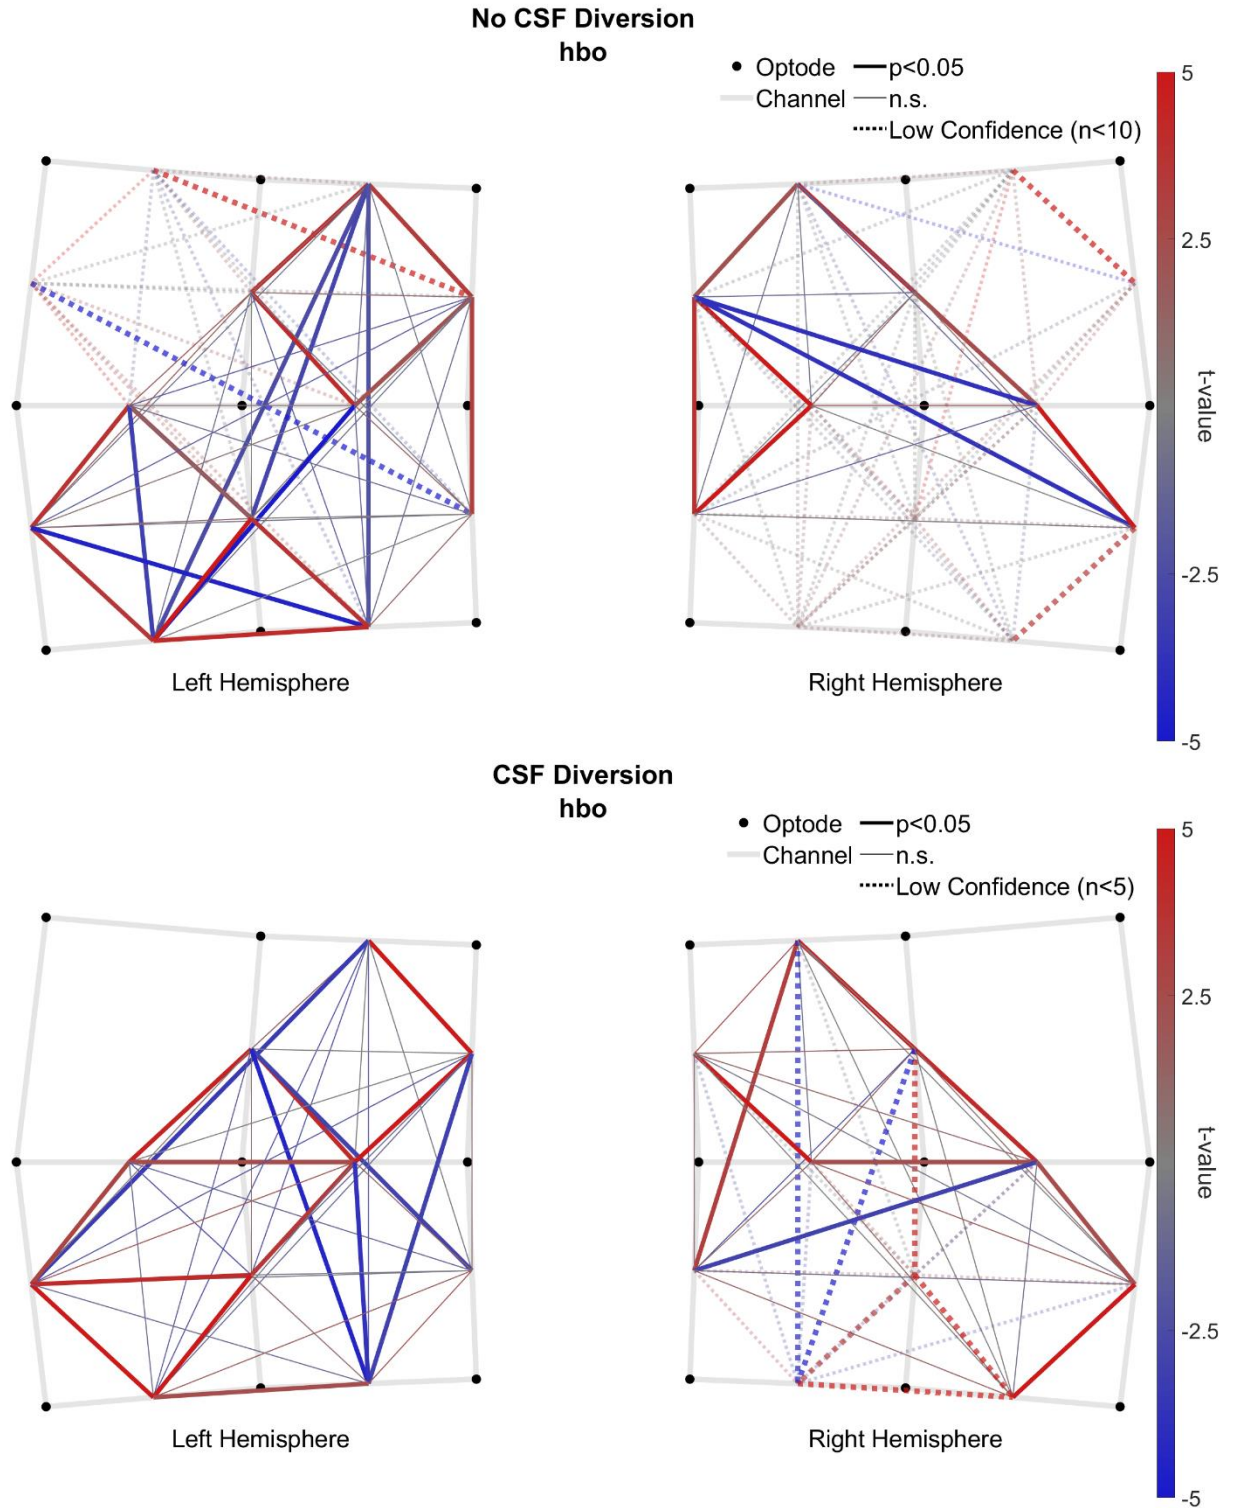

**Supplementary Figure 8:** Group level sFC maps (top row, “No CSF Diversion group,  $n = 23$ ”; bottom row, “CSF Diversion group”.  $N = 7$ ). HbO = oxygenated hemoglobin

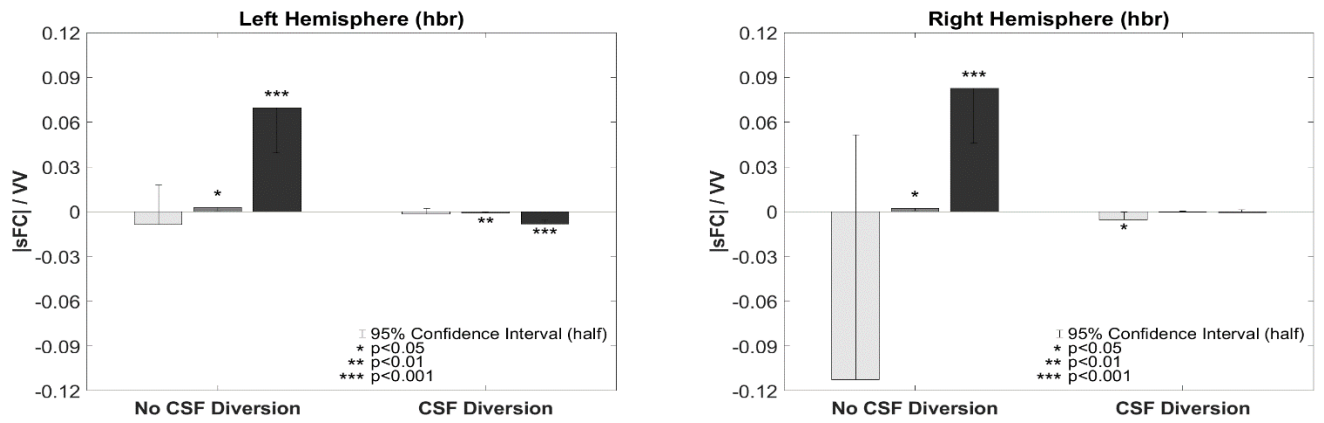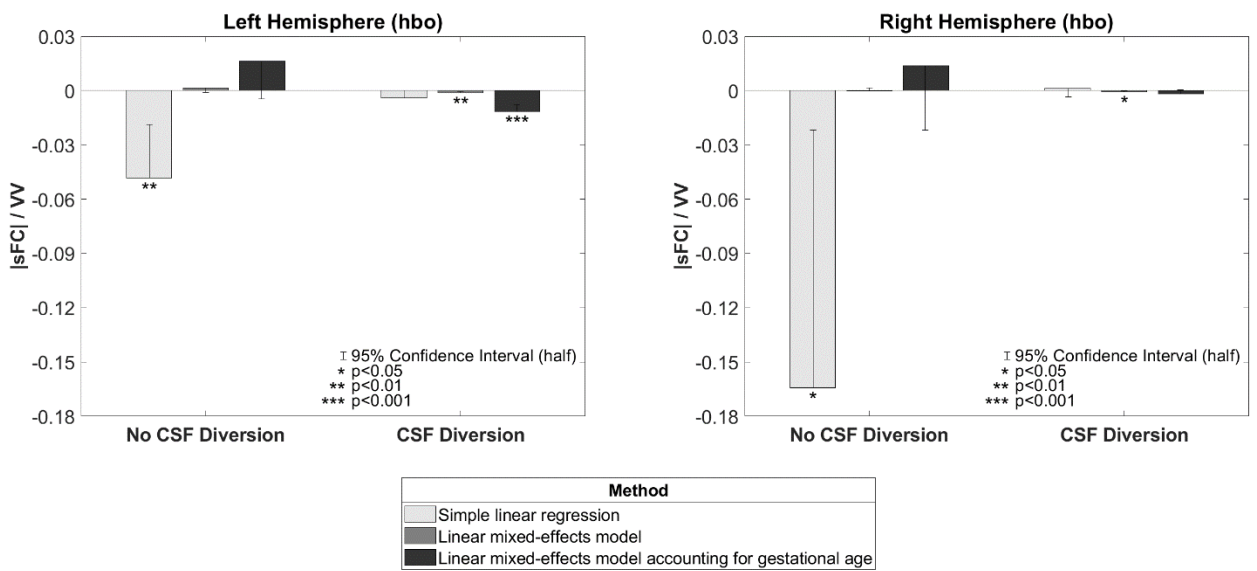

**Supplementary Figure 9: Hemispheric trends in group level sFC/VV from each slope method. Top row = deoxygenated hemoglobin (HbR). Bottom row = oxygenated hemoglobin (HbO)**
